# Supplementary material for: Evidence for low density holes in Jupiter’s ionosphere
Source: PubMed Central journal article supplement (PMC6588597; doi:10.1038/s41467-019-10708-w), 2019-06-21
Supplement: 41467_2019_10708_MOESM1_ESM.pdf [file 41467_2019_10708_MOESM1_ESM.pdf]

Supplementary Information of

## **Evidence for low density holes in Jupiter's ionosphere**

Masafumi Imai<sup>1</sup>, Ivana Kolmašová<sup>2,3</sup>, William S. Kurth<sup>1</sup>, Ondřej Santolík<sup>2,3</sup>, George B. Hospodarsky<sup>1</sup>, Donald A. Gurnett<sup>1</sup>, Shannon T. Brown<sup>4</sup>, Scott J. Bolton<sup>5</sup>, John E. P. Connerney<sup>6,7</sup> & Steven M. Levin<sup>4</sup>

<sup>1</sup>Department of Physics and Astronomy, University of Iowa, Iowa City, Iowa, USA. <sup>2</sup>Department of Space Physics, Institute of Atmospheric Physics, The Czech Academy of Sciences, Prague, Czechia.

<sup>3</sup>Faculty of Mathematics and Physics, Charles University, Prague, Czechia. <sup>4</sup>Jet Propulsion Laboratory, California Institute of Technology, Pasadena, California, USA. <sup>5</sup>Space Science and Engineering Division, Southwest Research Institute, San Antonio, Texas, USA. <sup>6</sup>Space Research Corporation, Annapolis, Maryland, USA. <sup>7</sup>NASA Goddard Space Flight Center, Greenbelt, Maryland, USA.

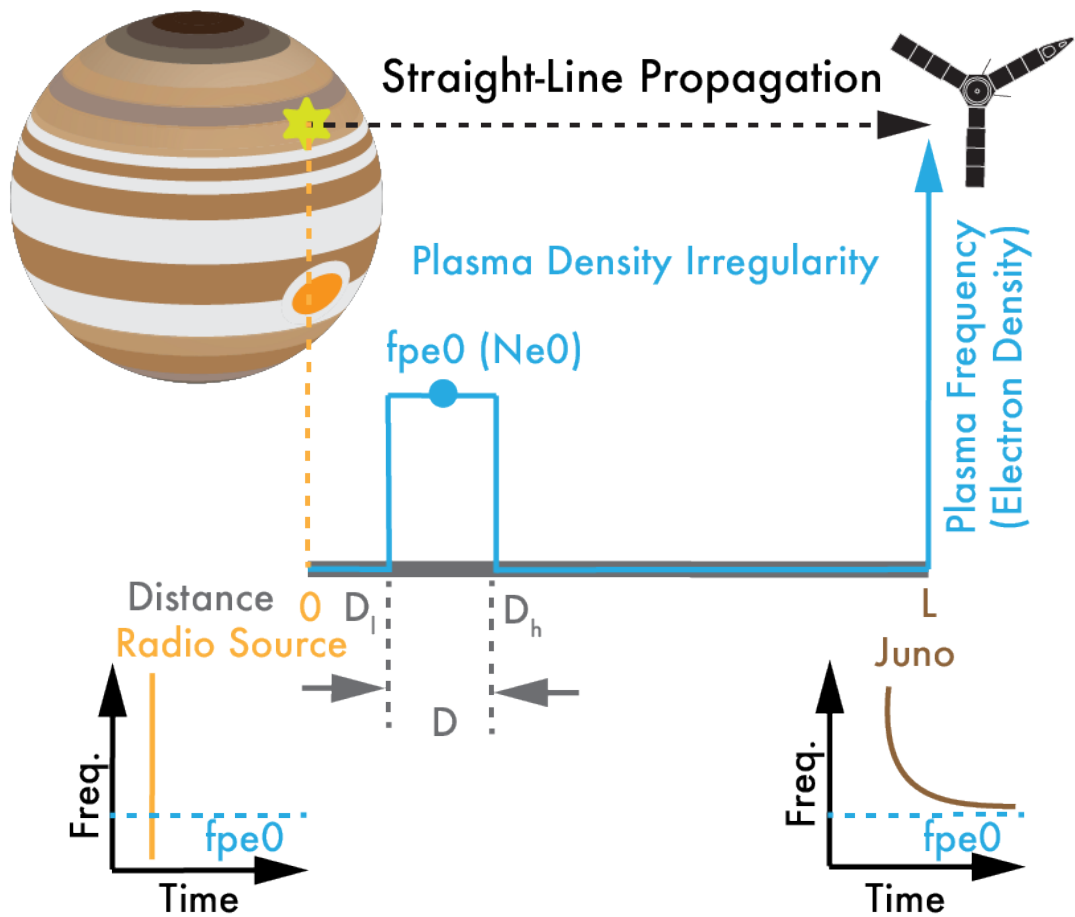

**Supplementary Figure 1 | Schematic of the O mode straight-line propagation model.** Juno, an unknown radio source, and a plasma density irregularity are collinear. The impulse propagates from the source through the plasma irregularity and continues on to Juno, where the dispersed signal is detected.

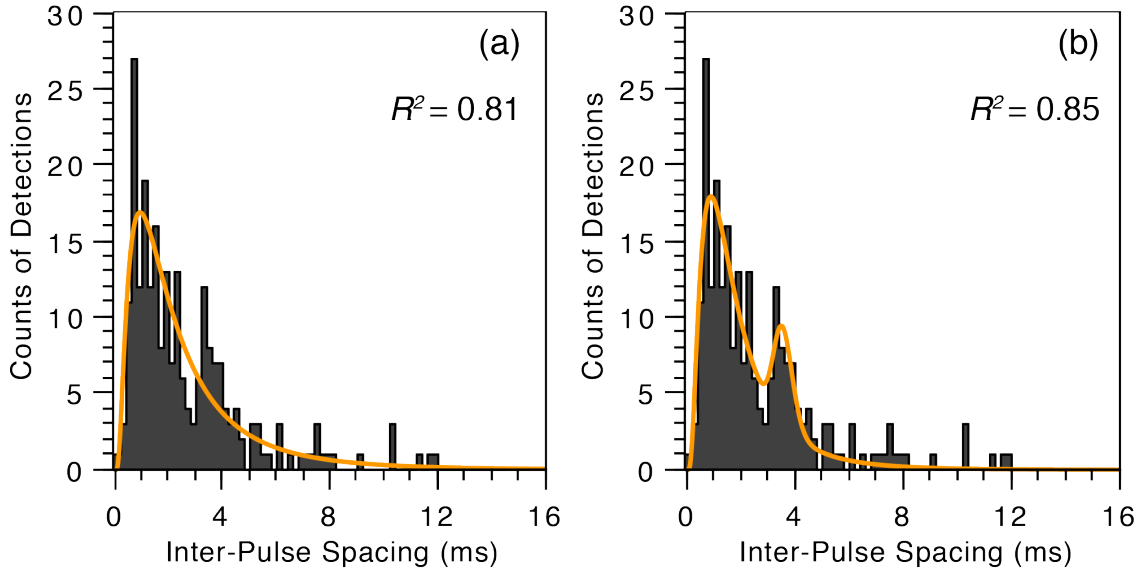

**Supplementary Figure 2 | Histograms of inter-pulse spacing.** The fittings are made with (a) one modified log-normal distribution and (b) two modified log-normal distributions. The modified log-normal distribution is  $f(x) = \sum_{i=0}^n \frac{A_i}{\sqrt{2}S_i x} \exp\left(-\frac{(\ln x - M_i)^2}{2S_i^2}\right)$ . The best-fitting results are  $A_0 = 46.96$ ,  $S_0 = 0.85$ , and  $M_0 = 0.63$  for (a) at  $n = 0$ , and  $A_{0,1} = (38.49, 5.46)$ ,  $S_{0,1} = (0.74, 0.10)$ , and  $M_{0,1} = (0.42, 1.27)$  for (b) at  $n = 1$ . The coefficient of determination is defined as  $R^2 = 1 - \sum_{i=1}^{80} \frac{(y_i - m_i)^2}{(y_i - \bar{y})^2}$ , where  $y_i$  and  $\bar{y}$  are the observation data in the histogram and their mean value, and  $m_i$  is the model data computed from the best-fitted distributions.

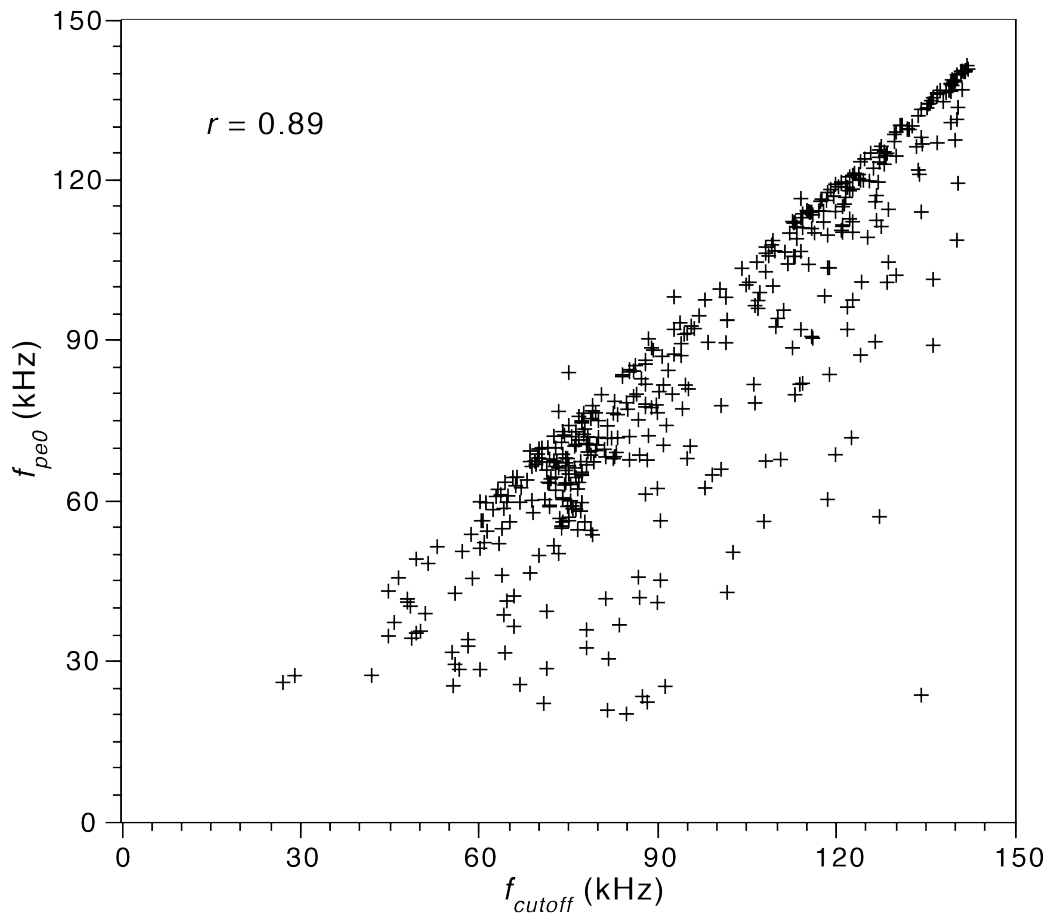

**Supplementary Figure 3 | Comparison of  $f_{pe0}$  and  $f_{cutoff}$ .** The former was estimated from the O mode propagation model and the latter was measured from the spectrograms. Pearson correlation coefficient  $r$  is 0.89, a positive correlation.

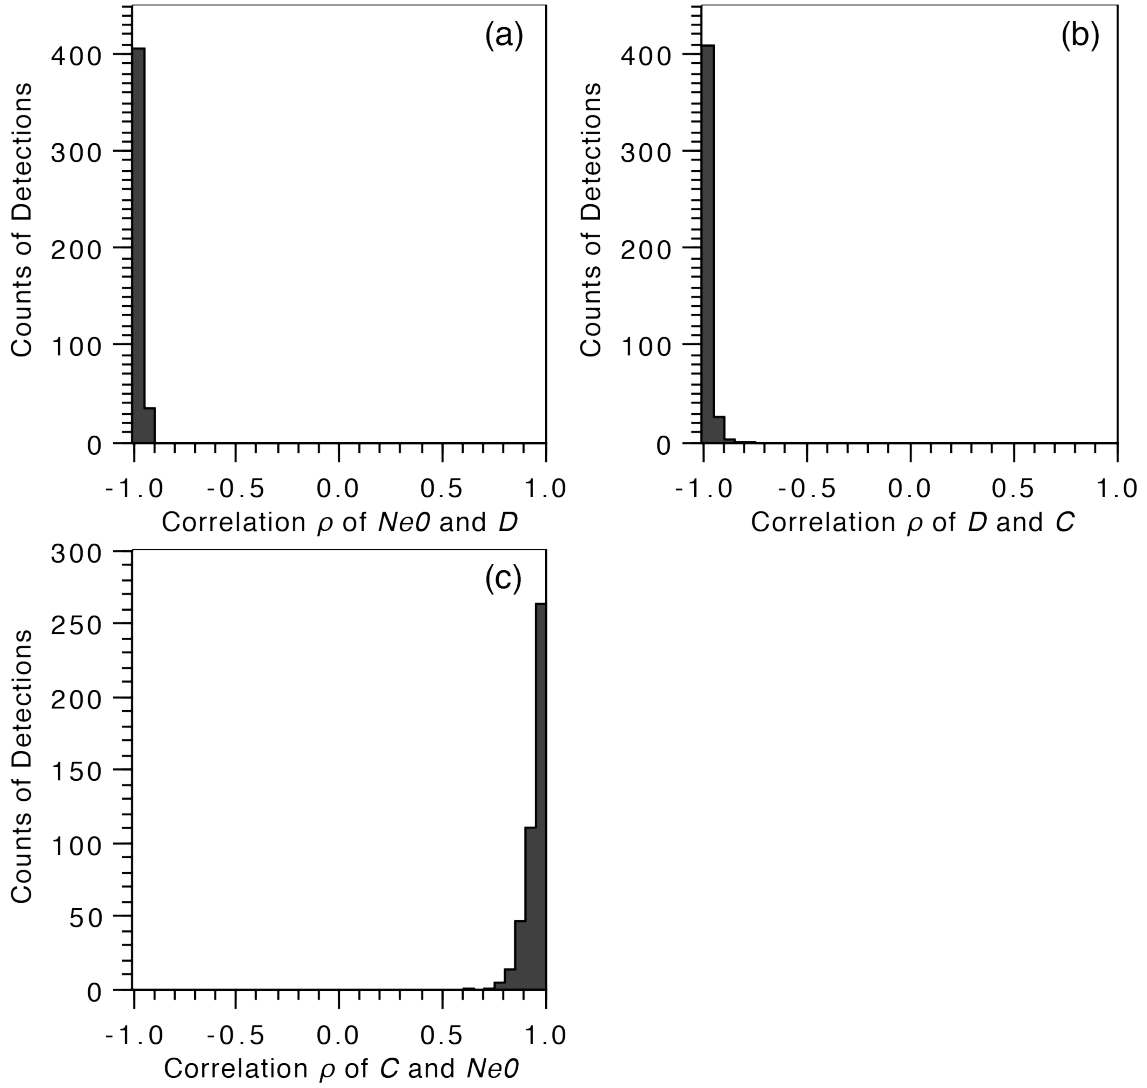

**Supplementary Figure 4 | Histograms of correlations of the model parameters.** The correlation is defined as  $\rho = \frac{\sum_{i=0}^n (x_i - \bar{x})(y_i - \bar{y})}{\sqrt{\sum_{i=0}^n (x_i - \bar{x})^2} \cdot \sqrt{\sum_{i=0}^n (y_i - \bar{y})^2}}$ , where  $x_i$  and  $y_i$  are the model variables of  $N_{e0}$  and  $D$  for (a),  $D$  and  $C$  for (b), and  $C$  and  $N_{e0}$  for (c), respectively.  $\bar{x}$  and  $\bar{y}$  are the mean values of the corresponding variables.

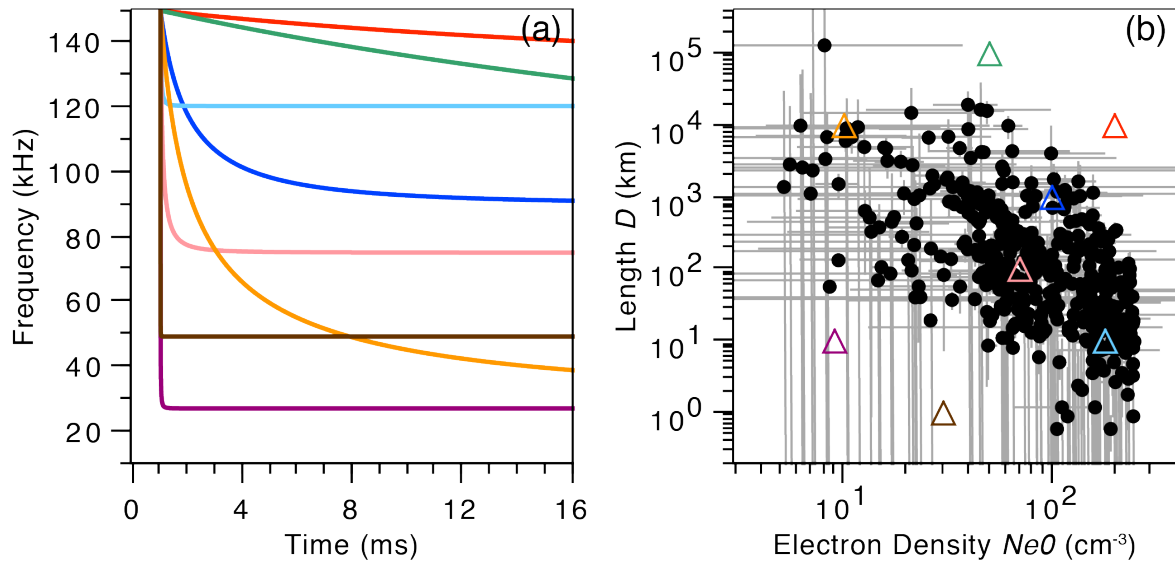

**Supplementary Figure 5 | Simulated dispersed pulses using the propagation model.** (a) The red, green, blue, sky blue, pink, orange, purple, and brown curves represent the cases of  $(200, 10^4)$ ,  $(50, 10^5)$ ,  $(100, 10^3)$ ,  $(180, 10)$ ,  $(70, 10^2)$ ,  $(10, 10^4)$ ,  $(9, 10)$  and  $(30, 1)$ , respectively, where the listed values refer to  $(N_{e0}$  in  $\text{cm}^{-3}$ ,  $D$  in km). Note that the initial arrival time of all examples were sorted at 1 ms. (b) The plot is the same as in Figure 2c, but the triangles show the corresponding colour dispersed pulses in (a). The grey error bar indicates one standard deviation (68% confidence interval) of  $N_{e0}$  and  $D$ . It is clear that the O mode straight-line propagation model allows to express various types of spectral structures but the nature of JDPs appears the limited sets of  $D$  and  $N_{e0}$  (e.g. the orange, blue, pink, and sky blue dispersed pulses). In contrast, the green, red, purple, and brown dispersed pulses were not detected in our study.

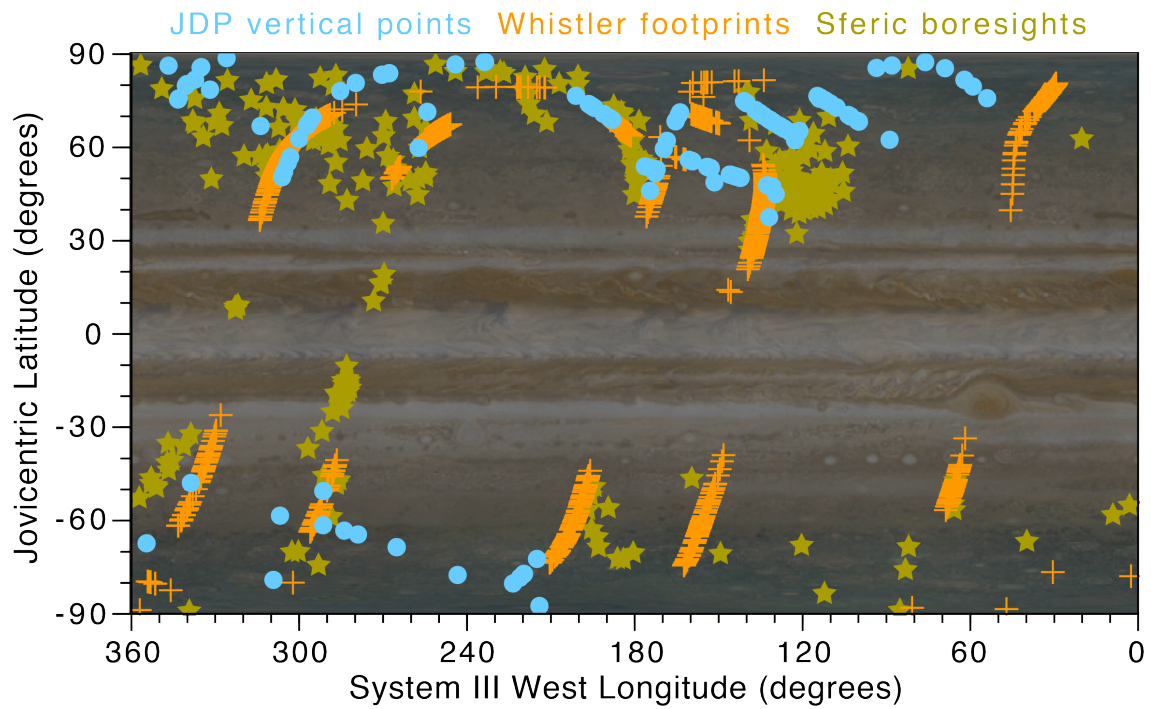

**Supplementary Figure 6 | Comparison of JDPs, lightning-induced whistlers and sferics.** The format is the same as in Fig. 3 but for the common periods from perijove 1 through 8. We use data during intervals when the Waves LFR-Hi mode observations were available. The Jovian image was provided by NASA/JPL-Caltech/SSI/SwRI/MSSS/ASI/INAF/JIRAM/Björn Jónsson (<http://www.planetary.org/multimedia/space-images/jupiter/merged-cassini-and-juno.html>).

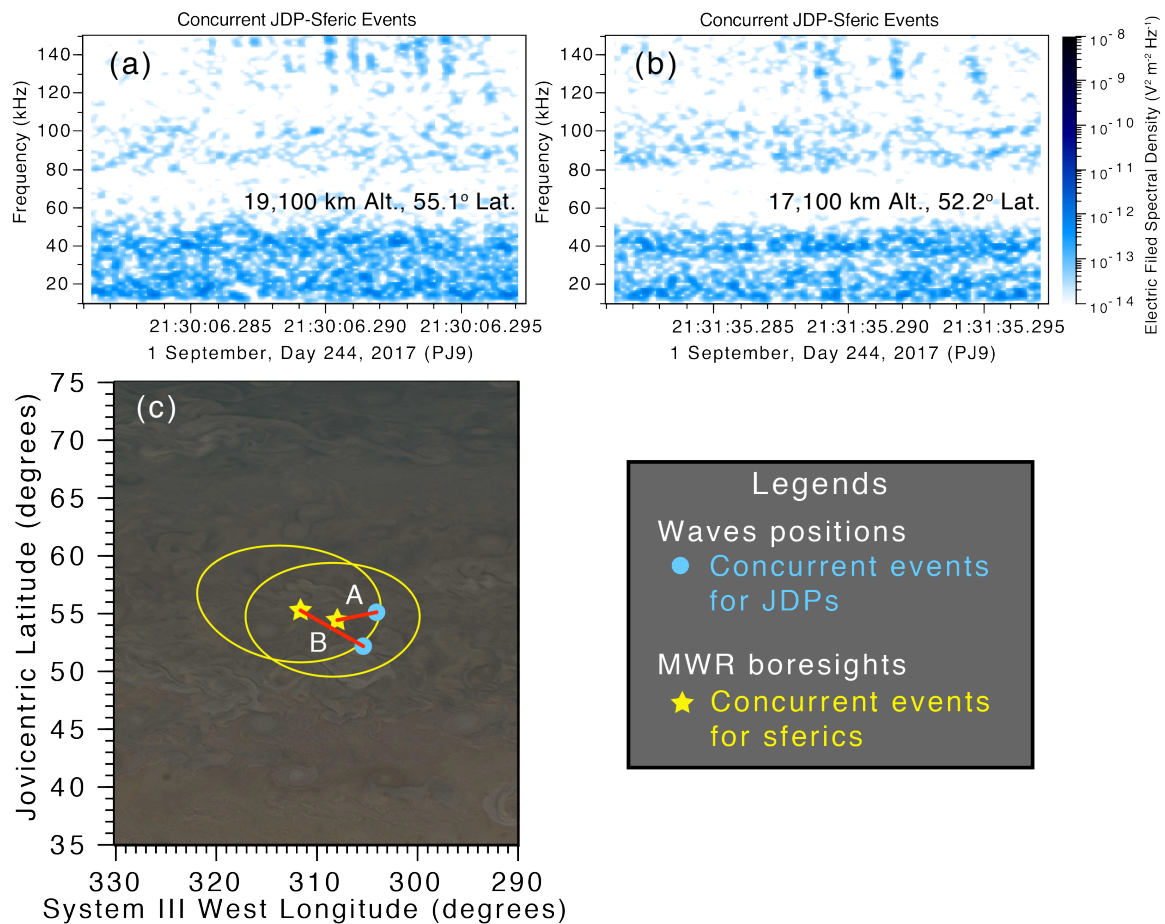

**Supplementary Figure 7 | Concurrent JDP-sferic events.** The time spans are (a) 21:30:06.281-06.297384 and (b) 21:31:35.281-35.297384 on 1 September, 2017. (c) The locations of JDPs and sferics for these events are depicted. We found 39 MWR sferic 100-ms events that overlap with Waves 16.384-ms snapshots but there were only two Waves snapshots in which we detected JDPs. The yellow ellipses indicate the MWR 17° beam half-angle projected onto Jupiter corresponding to about 90% of the received power<sup>22</sup>. One reason for a small number of concurrent event is a different propagation scenario. While the 600-MHz sferics propagate freely through the dense ionosphere, the JDPs can be seen only when ionospheric holes are present. Another possibility is an unclear number of sferics during a Waves snapshot. While Waves can clearly capture individual JDPs in a 16.384-ms waveform snapshot, there is no way to identify exactly when individual sferics occur within the MWR sferic 100-ms integration time. These observational and instrumental restrictions most probably limit the number of the concurrent JDP and sferic events. The Jovian image in (c) was provided by NASA/JPL-Caltech/SSI/SwRI/MSSS/ASI/INAF/JIRAM/Björn Jónsson (<http://www.planetary.org/multimedia/space-images/jupiter/merged-cassini-and-juno.html>).



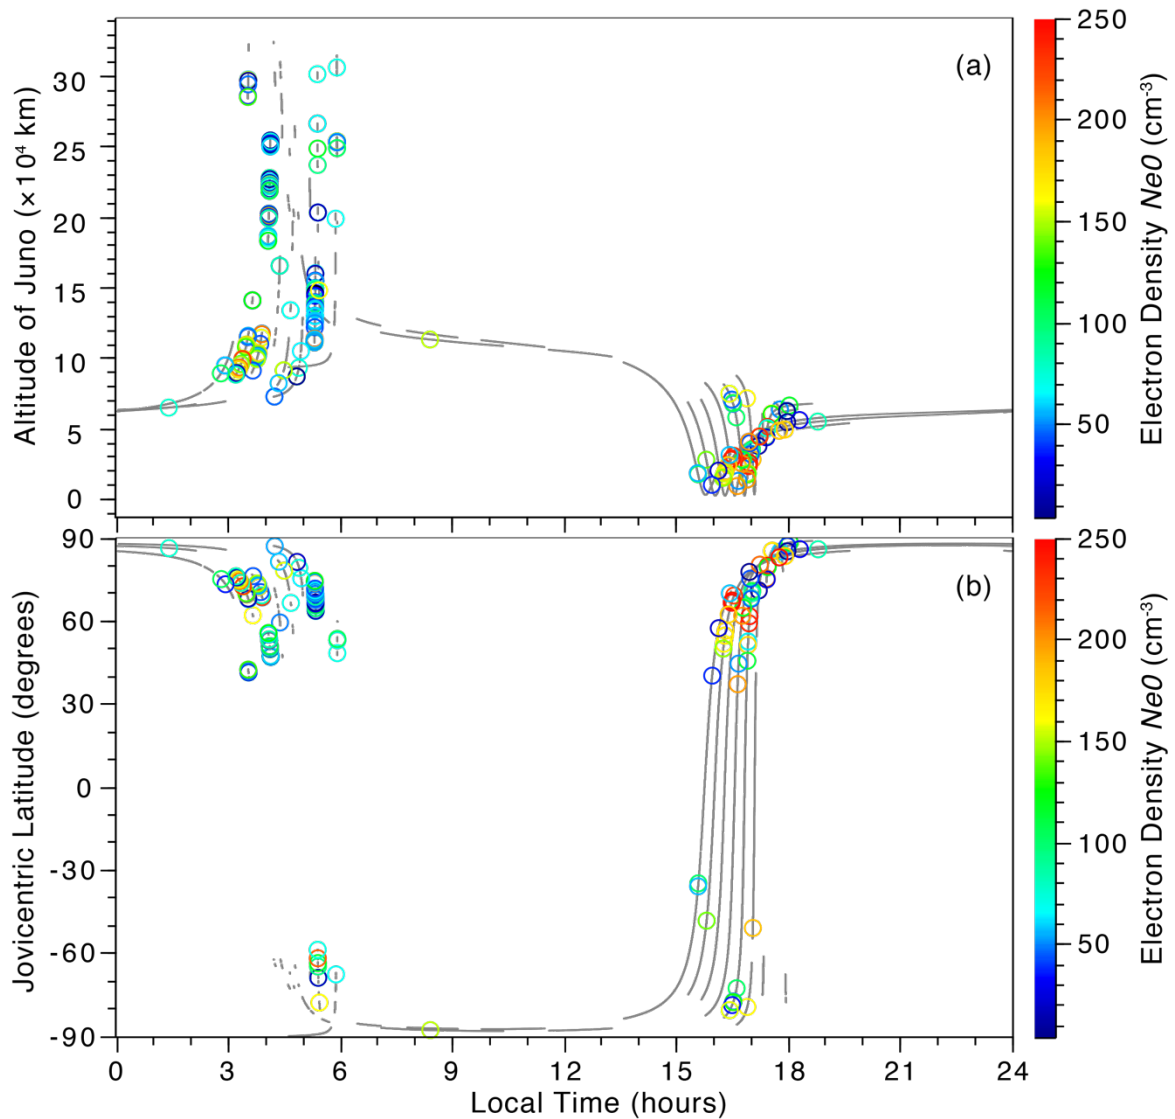

**Supplementary Figure 8 | Estimated electron density  $N_{e0}$  from JDPs.** These distributions in local time are plotted as a function of (a) altitude of Juno and (b) Jovicentric latitude at Juno. The grey lines correspond to the Waves LFR-Hi observational coverage from PJ1 through PJ9. Although almost all JDP detections are captured on Jupiter’s dawn and dusk sides, one JDP is detected on the day side near  $90^\circ$  latitude, which means that this JDP can come from a thunderstorm in any local time. Hence, Juno’s detections of JDPs are near the terminator, which supports possible radio sources of JDPs and ionospheric holes on Jupiter’s night side.

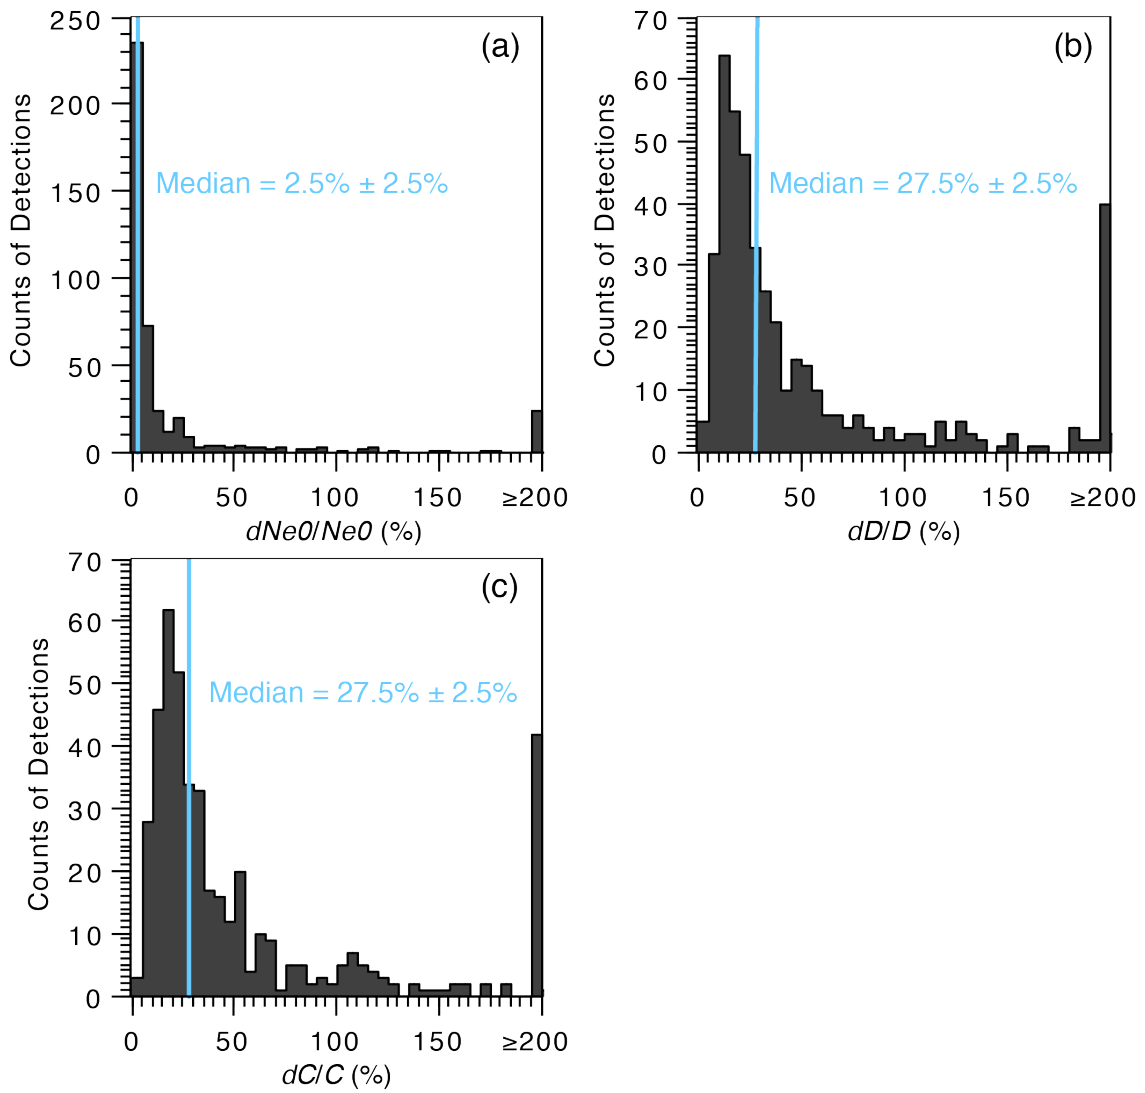

**Supplementary Figure 9 | Histograms of fractions of the model parameters.** Three parameters  $dN_{e0}$ ,  $dD$ , and  $dC$  are one standard deviation (68% confidence interval) of  $N_{e0}$ ,  $D$ , and  $C$  based on the least-square fitting with the O mode propagation model.

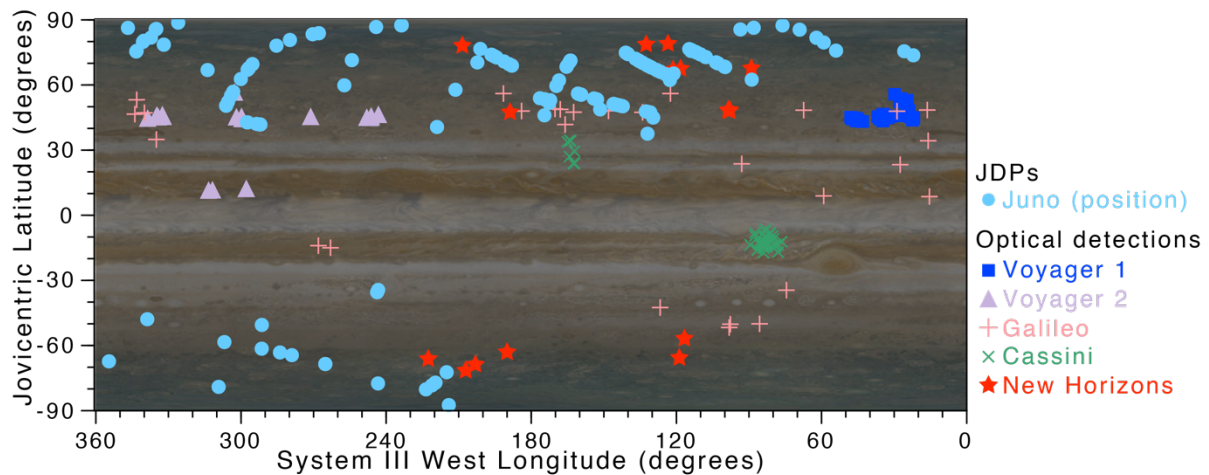

**Supplementary Figure 10 | Global distribution map of Jupiter's lightning.** The locations of 445 detections of JDPs are compared with the optical detections made by Voyager 1 (36 lightning locations)<sup>1</sup>, Voyager 2 (18 lightning locations)<sup>2</sup>, Galileo (estimated 336 flashes in 28 storms)<sup>3,4</sup>, Cassini (50 flashes in four spots)<sup>5</sup>, and New Horizons (18 flashes)<sup>6</sup>. The corresponding symbols and colours indicate in the legends on the right side. The Jovian image was provided by NASA/JPL-Caltech/SSI/SwRI/MSSS/ASI/INAF/JIRAM/Björn Jónsson (<http://www.planetary.org/multimedia/space-images/jupiter/merged-cassini-and-juno.html>).

## References

1. Williams, M. A. An analysis of the Voyager images of jovian lightning *The University of Arizona* (1986).
2. Borucki, W. J. & Magalhães, J. A. Analysis of Voyager 2 images of Jovian lightning *Icarus* **96**, 1-14 (1992).
3. Little, B. *et al.* Galileo Images of Lightning on Jupiter *Icarus* **142**, 306-323 (1999).
4. Gierasch, P. J. *et al.* Observation of moist convection in Jupiter's atmosphere *Nature* **403**, 628-630 (2000).
5. Dyudina, U. A. *et al.* Lightning on Jupiter observed in the H $\alpha$  line by the Cassini imaging science subsystem *Icarus* **172**, 24-36 (2004).
6. Baines, K. H. *et al.* Polar Lightning and Decadal-Scale Cloud Variability on Jupiter *Science* **318**, 226-229 (2007).
